# Supplementary material for: Postcranial elements of small mammals as indicators of locomotion and habitat
Source: PeerJ journal article supplement (doi:10.7717/peerj.9634), 2020-09-02

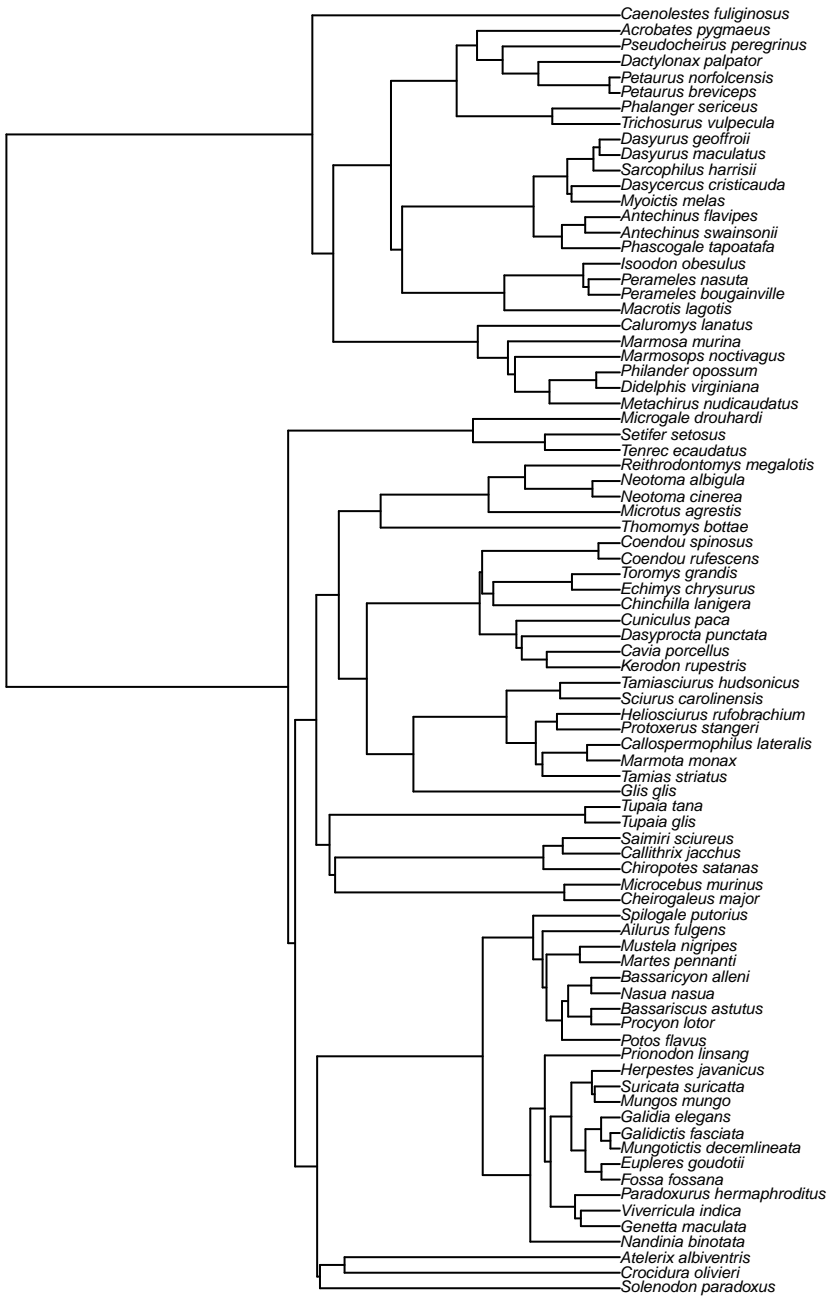

Supplement: Janis_&_Martin_Serra_Figure_S1.pdf [file Janis_&_Martin_Serra_Figure_S1.pdf]
